# Supplementary material for: Incorporating [GaB4O11(OH)]8−clusters to construct luminescent galloborate with open-framework layers
Source: Royal Society of Chemistry journal article supplement (doi:10.1039/c4ce00485j), 2014-01-01
Supplement: c4ce00485j1.pdf [file c4ce00485j1.pdf]

### Supporting Information

#### Incorporating $[\text{GaB}_4\text{O}_{11}(\text{OH})]^{8-}$ clusters to construct luminescent galloborate with open-framework layers

Ting-Ting Deng,<sup>a</sup> Yan-E Gao,<sup>a</sup> Li-Xia Zhang,<sup>a</sup> Xiang-Yu Gu,<sup>a</sup> Han-Rui Tian,<sup>a</sup> Yi Liu,<sup>b</sup> Yun-Long Feng,<sup>a</sup> and Jian-Wen Cheng\*<sup>a</sup>

<sup>a</sup> Key Laboratory of the Ministry of Education for Advanced Catalysis Materials, Institute of Physical Chemistry, Zhejiang Normal University, Jinhua, Zhejiang, 321004, P. R. China; E-mail: jwcheng@zjnu.cn

<sup>b</sup> Department of Materials and Engineering, Zhejiang University, Hangzhou, Zhejiang, 310027, P. R. China

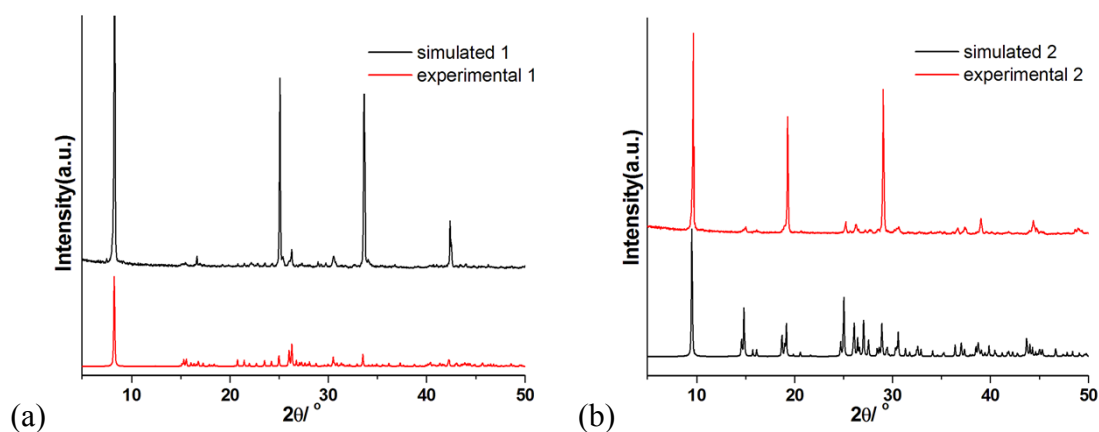

**Figure S1.** Simulated and experimental PXRD patterns of **1**(a) and **2**(b).

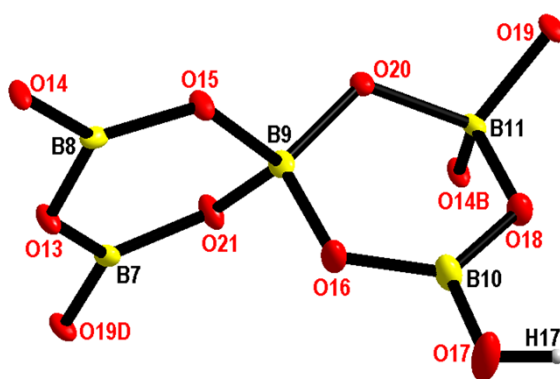

**Figure S2.** The other  $\text{B}_5\text{O}_{10}(\text{OH})$  cluster in **1**, Symmetry codes for the generated atoms are the same as those in Table 2.

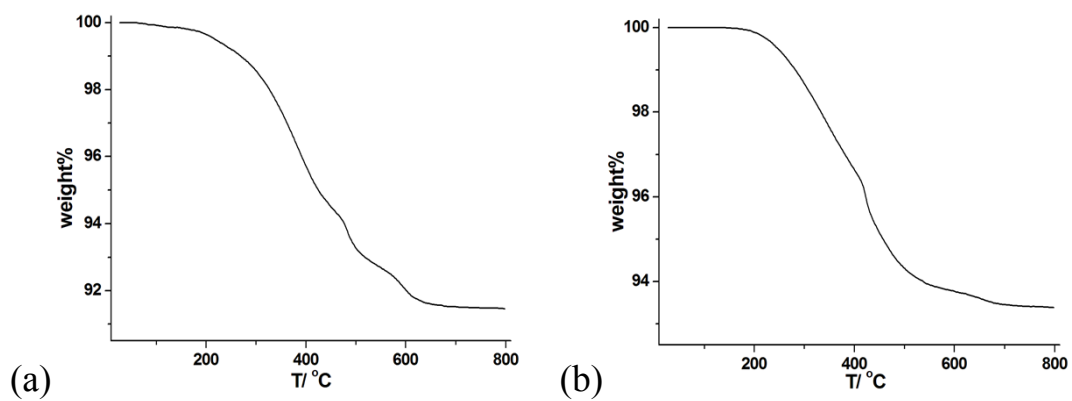

**Figure S3.** TGA curves of **1** and **2**.

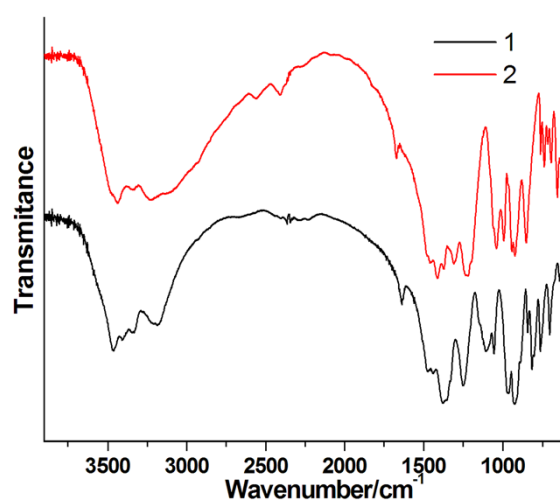

**Figure S4.** The IR spectra of **1** and **2**.

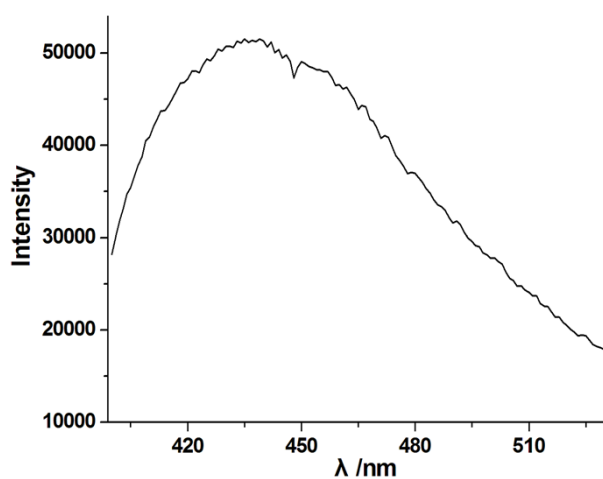

**Figure S5.** Emission spectra of **2** (ex = 370 nm) in solid state at room temperature.
